# Supplementary material
Source: Springer Nature journal article supplement (https://www.springermedizin.de/resource/supplementary/12933_2011_370_MOESM6_ESM.pdf/9538298)

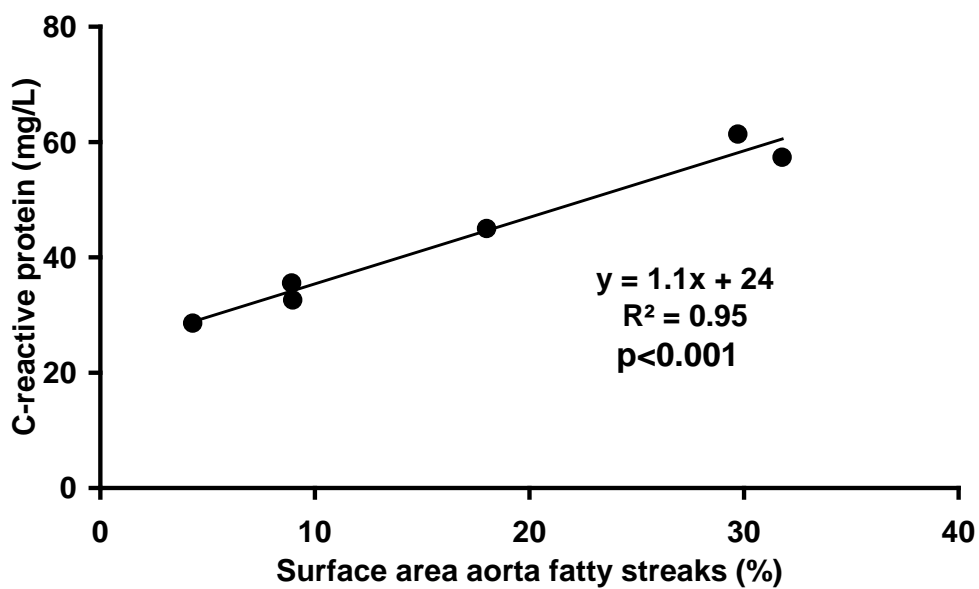

Supplement: MOESM6 [file 9538298]
